# Supplementary material for: Transcriptomic analysis of intestinal organoids, derived from pigs divergent in feed efficiency, and their response to Escherichia coli
Source: PubMed Central journal article supplement (PMC10863143; doi:10.1186/s12864-024-10064-0), 2024-02-13
Supplement: 12864_2024_10064_MOESM1_ESM.pdf [file 12864_2024_10064_MOESM1_ESM.pdf]

1 **Additional file 1.** RNA-seq data and alignment results of the 44 colon organoids samples

| Group                  | Sample | Replicate | Raw reads  | Trimmed reads | Uniquely mapped reads | % Uniquely mapped reads |
|------------------------|--------|-----------|------------|---------------|-----------------------|-------------------------|
| Low                    | 2      | 1         | 33,789,331 | 33,374,900    | 32,022,491            | 95.95                   |
|                        |        | 2         | 35,726,364 | 35,309,894    | 33,753,802            | 95.59                   |
|                        | 3      | 1         | 35,635,910 | 35,196,607    | 33,479,344            | 95.12                   |
|                        |        | 2         | 31,051,327 | 30,677,225    | 29,017,206            | 94.59                   |
|                        | 5      | 1         | 30,956,870 | 30,564,649    | 29,239,187            | 95.66                   |
|                        |        | 2         | 33,801,922 | 33,402,924    | 31,878,411            | 95.44                   |
|                        | 8      | 1         | 31,015,974 | 30,670,015    | 29,499,096            | 96.18                   |
|                        |        | 2         | 38,696,781 | 38,232,659    | 36,424,517            | 95.27                   |
|                        | 11     | 1         | 36,434,997 | 36,006,713    | 34,370,505            | 95.46                   |
|                        |        | 2         | 30,594,442 | 30,251,394    | 28,659,848            | 94.74                   |
| Low<br><i>E. coli</i>  | 2      | 1         | 33,848,722 | 33,481,244    | 32,225,047            | 96.25                   |
|                        |        | 2         | 35,407,139 | 34,970,938    | 33,387,923            | 95.47                   |
|                        | 3      | 1         | 35,606,275 | 35,163,069    | 33,491,497            | 95.25                   |
|                        |        | 2         | 32,628,560 | 32,228,384    | 30,487,013            | 94.60                   |
|                        | 5      | 1         | 31,137,837 | 30,745,870    | 29,381,049            | 95.56                   |
|                        |        | 2         | 33,328,899 | 32,904,484    | 31,326,619            | 95.20                   |
|                        | 8      | 1         | 32,717,625 | 32,327,982    | 30,994,841            | 95.88                   |
|                        |        | 2         | 32,214,141 | 31,817,235    | 30,296,880            | 95.22                   |
|                        | 11     | 1         | 35,160,709 | 34,730,585    | 33,151,772            | 95.45                   |
|                        |        | 2         | 32,843,986 | 32,467,464    | 30,748,181            | 94.70                   |
| High                   | 4      | 1         | 33,003,772 | 32,564,498    | 31,084,129            | 95.45                   |
|                        |        | 2         | 32,604,835 | 32,225,072    | 30,710,371            | 95.30                   |
|                        | 6      | 1         | 37,211,770 | 36,775,210    | 35,146,161            | 95.57                   |
|                        |        | 2         | 33,598,668 | 33,199,038    | 31,569,110            | 95.09                   |
|                        | 7      | 1         | 34,233,346 | 33,852,458    | 32,130,709            | 94.91                   |
|                        |        | 2         | 30,516,726 | 30,172,430    | 28,410,558            | 94.16                   |
|                        | 9      | 1         | 34,975,883 | 34,590,031    | 33,173,779            | 95.91                   |
|                        |        | 2         | 31,936,840 | 31,572,514    | 30,238,990            | 95.78                   |
|                        | 10     | 1         | 32,035,675 | 31,637,030    | 30,042,678            | 94.96                   |
|                        |        | 2         | 35,938,549 | 35,530,857    | 33,595,052            | 94.55                   |
|                        | 12     | 1         | 31,063,240 | 30,687,599    | 29,523,271            | 96.21                   |
|                        |        | 2         | 32,966,166 | 32,581,343    | 31,129,043            | 95.54                   |
| High<br><i>E. coli</i> | 4      | 1         | 35,057,765 | 34,624,226    | 33,140,915            | 95.72                   |
|                        |        | 2         | 30,924,959 | 30,524,631    | 29,033,116            | 95.11                   |
|                        | 6      | 1         | 30,264,439 | 29,884,710    | 28,597,366            | 95.69                   |
|                        |        | 2         | 34,006,935 | 33,552,783    | 31,957,908            | 95.25                   |
|                        | 7      | 1         | 34,684,129 | 34,259,759    | 32,541,159            | 94.98                   |
|                        |        | 2         | 34,359,108 | 33,954,646    | 31,918,312            | 94.00                   |
|                        | 9      | 1         | 33,310,381 | 32,915,816    | 31,560,137            | 95.88                   |
|                        |        | 2         | 40,119,142 | 39,614,239    | 37,770,353            | 95.35                   |
|                        | 10     | 1         | 31,924,422 | 31,552,594    | 29,862,819            | 94.64                   |
|                        |        | 2         | 32,675,396 | 32,266,732    | 30,447,214            | 94.36                   |
|                        | 12     | 1         | 36,269,018 | 35,848,164    | 34,362,925            | 95.86                   |
|                        |        | 2         | 37,416,473 | 36,973,407    | 35,325,470            | 95.54                   |

2
