# Supplementary material for: Transcriptomic analysis of intestinal organoids, derived from pigs divergent in feed efficiency, and their response to Escherichia coli
Source: PubMed Central journal article supplement (PMC10863143; doi:10.1186/s12864-024-10064-0), 2024-02-13
Supplement: 12864_2024_10064_MOESM2_ESM.pdf [file 12864_2024_10064_MOESM2_ESM.pdf]

1 **Additional file 2.** Colon specific genes retrieved from TiGER database, mean and standard  
2 deviation (SD) of RSEM TPM values for 22 unchallenged low and high FE colon organoid  
3 samples. Red indicates genes not expressed (Threshold: TPM < 1)

| Genes           | mean   | SD     | Genes           | mean   | SD     | Genes           | mean    | SD      |
|-----------------|--------|--------|-----------------|--------|--------|-----------------|---------|---------|
| <i>A2ML1</i>    | 0.06   | 0.04   | <i>GPA33</i>    | 178.30 | 82.59  | <i>PSEN1</i>    | 52.15   | 12.80   |
| <i>ADAMTS13</i> | 0.47   | 0.67   | <i>GPR35</i>    | 7.70   | 4.95   | <i>PTPRH</i>    | 23.09   | 23.38   |
| <i>ANXA13</i>   | 35.01  | 24.46  | <i>GPX2</i>     | 241.63 | 116.57 | <i>R3HDML</i>   | 0.01    | 0.03    |
| <i>APOBEC1</i>  | 69.14  | 33.96  | <i>GRM8</i>     | 0.00   | 0.01   | <i>RAB20</i>    | 7.73    | 3.15    |
| <i>AQP8</i>     | 0.18   | 0.29   | <i>HEPH</i>     | 138.82 | 64.10  | <i>REG4</i>     | 579.67  | 336.38  |
| <i>ARHGAP25</i> | 0.02   | 0.04   | <i>HKDC1</i>    | 1.46   | 0.53   | <i>REN</i>      | 0.00    | 0.01    |
| <i>ASCL2</i>    | 0.29   | 0.34   | <i>HNF4A</i>    | 97.08  | 43.17  | <i>RNF186</i>   | 1.31    | 2.48    |
| <i>AXIN2</i>    | 6.56   | 1.24   | <i>HOXB6</i>    | 28.80  | 11.02  | <i>RSPO1</i>    | 0.00    | 0.01    |
| <i>B3GNT3</i>   | 251.78 | 62.25  | <i>HOXB8</i>    | 5.00   | 1.50   | <i>SATB2</i>    | 45.05   | 9.43    |
| <i>BAIAP2L2</i> | 41.92  | 40.78  | <i>HOXB9</i>    | 12.92  | 2.63   | <i>SENP5</i>    | 10.26   | 1.50    |
| <i>BMP4</i>     | 27.13  | 5.63   | <i>IHH</i>      | 47.15  | 35.21  | <i>SGK2</i>     | 17.03   | 14.76   |
| <i>CDH17</i>    | 587.78 | 391.52 | <i>IL1RL2</i>   | 0.00   | 0.00   | <i>SIM2</i>     | 0.06    | 0.07    |
| <i>CDX1</i>     | 141.96 | 36.65  | <i>IL22RA1</i>  | 28.75  | 17.25  | <i>SLC12A2</i>  | 108.02  | 44.72   |
| <i>CDX2</i>     | 16.12  | 10.50  | <i>KCNH8</i>    | 0.00   | 0.01   | <i>SLC17A4</i>  | 0.00    | 0.00    |
| <i>CFTR</i>     | 7.02   | 4.52   | <i>KCNQ1</i>    | 241.75 | 32.89  | <i>SLC22A18</i> | 33.89   | 8.40    |
| <i>CLCA1</i>    | 36.18  | 30.19  | <i>KRT20</i>    | 34.96  | 29.13  | <i>SLC26A3</i>  | 238.56  | 243.32  |
| <i>CLCA4</i>    | 437.43 | 369.01 | <i>LGALS4</i>   | 310.45 | 95.93  | <i>SLC44A3</i>  | 17.73   | 4.92    |
| <i>CLDN2</i>    | 0.97   | 0.61   | <i>LIPH</i>     | 186.40 | 52.09  | <i>SLC5A1</i>   | 8.04    | 2.78    |
| <i>CLDN3</i>    | 441.42 | 214.51 | <i>LRP4</i>     | 0.01   | 0.01   | <i>SLC6A20</i>  | 1.50    | 1.48    |
| <i>COL8A2</i>   | 0.07   | 0.03   | <i>MLXIPL</i>   | 0.97   | 0.79   | <i>SLC9A2</i>   | 2.51    | 2.50    |
| <i>CORIN</i>    | 0.09   | 0.08   | <i>MST1R</i>    | 156.24 | 27.01  | <i>ST14</i>     | 337.96  | 40.71   |
| <i>CYP2S1</i>   | 9.39   | 7.13   | <i>MT1A</i>     | 39.53  | 37.99  | <i>TFF3</i>     | 158.11  | 172.48  |
| <i>DAPK2</i>    | 0.26   | 0.31   | <i>MUC13</i>    | 179.32 | 105.19 | <i>TMC5</i>     | 7.09    | 4.46    |
| <i>DNMT3A</i>   | 5.57   | 0.71   | <i>MYH14</i>    | 157.45 | 65.11  | <i>TMEM45B</i>  | 146.92  | 79.37   |
| <i>DPEP1</i>    | 1.09   | 1.37   | <i>MYO1A</i>    | 22.46  | 24.57  | <i>TMEM54</i>   | 302.89  | 131.18  |
| <i>DUOX2</i>    | 0.23   | 0.21   | <i>MYO7B</i>    | 159.39 | 53.42  | <i>TMEM92</i>   | 8.61    | 6.54    |
| <i>EDAR</i>     | 2.33   | 1.30   | <i>OLFM4</i>    | 0.04   | 0.07   | <i>TMPRSS3</i>  | 0.13    | 0.16    |
| <i>EPHB3</i>    | 6.44   | 2.07   | <i>OVOL2</i>    | 2.99   | 1.13   | <i>TMPRSS4</i>  | 13.53   | 11.92   |
| <i>ETV3</i>     | 80.05  | 13.16  | <i>PIGR</i>     | 7.02   | 3.75   | <i>TRIM15</i>   | 3.56    | 2.55    |
| <i>EVX1</i>     | 0.54   | 0.32   | <i>PKP2</i>     | 109.09 | 19.43  | <i>TRIM7</i>    | 1.02    | 0.53    |
| <i>FANCB</i>    | 1.03   | 0.31   | <i>PLEKHG6</i>  | 24.98  | 11.26  | <i>TSPAN1</i>   | 2499.41 | 1777.71 |
| <i>FOXA3</i>    | 0.87   | 0.31   | <i>POF1B</i>    | 11.46  | 11.72  | <i>USH1C</i>    | 36.21   | 14.79   |
| <i>FREM2</i>    | 0.10   | 0.05   | <i>POU2F3</i>   | 0.44   | 0.34   | <i>VIL1</i>     | 351.42  | 138.74  |
| <i>GCNT3</i>    | 42.00  | 38.92  | <i>PPP1R14D</i> | 73.32  | 40.23  | <i>XKR9</i>     | 0.95    | 0.29    |
| <i>GMDS</i>     | 68.25  | 7.39   | <i>PROM2</i>    | 66.69  | 29.62  |                 |         |         |

4
