# Supplementary material for: Transcriptomic analysis of intestinal organoids, derived from pigs divergent in feed efficiency, and their response to Escherichia coli
Source: PubMed Central journal article supplement (PMC10863143; doi:10.1186/s12864-024-10064-0), 2024-02-13
Supplement: 12864_2024_10064_MOESM3_ESM.pdf [file 12864_2024_10064_MOESM3_ESM.pdf]

1 **Additional file 3.** The DESeq2 and EdgeR results of the differentially expressed genes (DEGs) between  
 2 unchallenged low and high FE organoids (FDR = False Discovery Rate).

| ENSEMBL ID                | Gene Name         | DESeq2 |          | EdgeR  |          |
|---------------------------|-------------------|--------|----------|--------|----------|
|                           |                   | logFC  | FDR      | logFC  | FDR      |
| <i>ENSSSCG00000027053</i> | <i>PACSIN1</i>    | 1.662  | 6.34E-07 | 1.669  | 2.27E-06 |
| <i>ENSSSCG00000040275</i> | <i>HEBP1</i>      | -0.524 | 6.34E-07 | -0.527 | 6.75E-05 |
| <i>ENSSSCG00000016822</i> | <i>AMACR</i>      | 1.358  | 0.0002   | 1.358  | 0.0002   |
| <i>ENSSSCG00000035617</i> | <i>RPL7a-like</i> | -1.036 | 0.0015   | -1.046 | 0.0056   |
| <i>ENSSSCG00000001975</i> | <i>PRKD1</i>      | -2.273 | 0.0010   | -2.223 | 0.0179   |
| <i>ENSSSCG00000022842</i> | .                 | 1.010  | 0.0211   | 1.006  | 0.0405   |

3
