# Supplementary material for: Transcriptomic analysis of intestinal organoids, derived from pigs divergent in feed efficiency, and their response to Escherichia coli
Source: PubMed Central journal article supplement (PMC10863143; doi:10.1186/s12864-024-10064-0), 2024-02-13
Supplement: 12864_2024_10064_MOESM5_ESM.pdf [file 12864_2024_10064_MOESM5_ESM.pdf]

1 **Additional file 5.** RNA-seq data and alignment results of the 8 ileum organoid samples

| Group                         | Sample   | Raw reads  | Trimmed reads | Uniquely mapped reads | % Uniquely mapped reads |
|-------------------------------|----------|------------|---------------|-----------------------|-------------------------|
| <b>Low</b>                    | <b>1</b> | 47,287,772 | 46,643,676    | 45,149,918            | 96.80                   |
|                               | <b>3</b> | 33,617,465 | 33,203,932    | 31,881,142            | 96.02                   |
|                               | <b>5</b> | 42,755,196 | 42,157,941    | 40,978,048            | 97.20                   |
|                               | <b>8</b> | 33,478,864 | 33,123,448    | 27,680,830            | 83.57                   |
| <b>Low<br/><i>E. coli</i></b> | <b>1</b> | 32,457,431 | 32,065,030    | 31,187,090            | 97.26                   |
|                               | <b>3</b> | 36,027,309 | 35,594,324    | 34,596,780            | 97.20                   |
|                               | <b>5</b> | 31,802,560 | 31,401,004    | 30,402,444            | 96.82                   |
|                               | <b>8</b> | 33,169,307 | 32,772,650    | 31,929,766            | 97.43                   |

2
