# Supplementary material for: Transcriptomic analysis of intestinal organoids, derived from pigs divergent in feed efficiency, and their response to Escherichia coli
Source: PubMed Central journal article supplement (PMC10863143; doi:10.1186/s12864-024-10064-0), 2024-02-13
Supplement: 12864_2024_10064_MOESM6_ESM.pdf [file 12864_2024_10064_MOESM6_ESM.pdf]

1 **Additional file 6.** Small intestine specific genes retrieved from TiGER database, mean and  
2 standard deviation (SD) of RSEM TPM values for 4 unchallenged low FE ileum organoid  
3 samples. Red indicate genes not expressed (Threshold: TPM < 1)

| Genes           | mean   | SD     | Genes           | mean   | SD    |
|-----------------|--------|--------|-----------------|--------|-------|
| <i>ABCA3</i>    | 4.82   | 1.66   | <i>M6PR</i>     | 123.03 | 18.73 |
| <i>ALDH1A1</i>  | 506.12 | 330.62 | <i>MEP1B</i>    | 0.05   | 0.08  |
| <i>ALDOB</i>    | 0.24   | 0.63   | <i>MMRN1</i>    | 0.00   | 0.00  |
| <i>APOB</i>     | 3.11   | 4.91   | <i>MTTP</i>     | 0.97   | 0.88  |
| <i>BMP4</i>     | 24.68  | 12.41  | <i>NDST1</i>    | 26.89  | 6.75  |
| <i>C15orf39</i> | 14.68  | 2.09   | <i>NELL2</i>    | 0.05   | 0.06  |
| <i>CALR</i>     | 734.26 | 88.75  | <i>OSR2</i>     | 33.28  | 16.54 |
| <i>CCDC9</i>    | 30.89  | 2.58   | <i>PAX6</i>     | 0.61   | 1.18  |
| <i>CDH17</i>    | 27.13  | 44.09  | <i>PCDH18</i>   | 0.74   | 0.50  |
| <i>CLCA1</i>    | 329.84 | 545.16 | <i>PCDH9</i>    | 0.05   | 0.10  |
| <i>CLCN7</i>    | 16.69  | 3.41   | <i>PHF6</i>     | 18.33  | 2.20  |
| <i>CLPTM1</i>   | 84.49  | 9.78   | <i>PTDSS2</i>   | 11.52  | 1.09  |
| <i>CNNM2</i>    | 0.20   | 0.09   | <i>SCD</i>      | 72.59  | 23.88 |
| <i>COL5A2</i>   | 0.43   | 0.14   | <i>SEC14L1</i>  | 35.66  | 5.53  |
| <i>CPT1C</i>    | 0.06   | 0.07   | <i>SEC61A1</i>  | 119.29 | 23.17 |
| <i>DHCR7</i>    | 50.11  | 5.31   | <i>SI</i>       | 0.00   | 0.00  |
| <i>DKK1</i>     | 0.00   | 0.00   | <i>SLC26A3</i>  | 0.58   | 0.84  |
| <i>DSC2</i>     | 104.66 | 45.89  | <i>SLC39A1</i>  | 73.62  | 4.76  |
| <i>DUSP6</i>    | 34.66  | 7.66   | <i>SLC4A2</i>   | 73.96  | 16.01 |
| <i>EDNRA</i>    | 0.91   | 0.86   | <i>SLIT2</i>    | 0.38   | 0.33  |
| <i>ENC1</i>     | 131.69 | 41.98  | <i>SNCA</i>     | 0.08   | 0.10  |
| <i>EPHA7</i>    | 0.08   | 0.08   | <i>SPCS2</i>    | 158.86 | 12.37 |
| <i>FGF10</i>    | 0.00   | 0.00   | <i>SPIN1</i>    | 52.65  | 9.25  |
| <i>FURIN</i>    | 98.55  | 24.57  | <i>SPRY2</i>    | 29.18  | 11.16 |
| <i>GAA</i>      | 26.78  | 1.99   | <i>STX12</i>    | 106.38 | 10.27 |
| <i>GANAB</i>    | 214.00 | 15.74  | <i>SYPL2</i>    | 0.18   | 0.17  |
| <i>GCG</i>      | 0.03   | 0.04   | <i>TCOF1</i>    | 24.76  | 6.93  |
| <i>IPO4</i>     | 49.14  | 4.88   | <i>TFRC</i>     | 77.45  | 24.87 |
| <i>ITGAV</i>    | 196.59 | 61.34  | <i>TNFRSF19</i> | 2.11   | 1.26  |
| <i>KIF1A</i>    | 0.28   | 0.14   | <i>TPBG</i>     | 28.97  | 6.77  |
| <i>KITLG</i>    | 50.77  | 16.41  | <i>ZNF398</i>   | 5.36   | 0.83  |
| <i>KREMEN2</i>  | 3.80   | 1.38   | <i>ZNF512</i>   | 3.23   | 1.27  |

4
