# Supplementary material for: Transcriptomic analysis of intestinal organoids, derived from pigs divergent in feed efficiency, and their response to Escherichia coli
Source: PubMed Central journal article supplement (PMC10863143; doi:10.1186/s12864-024-10064-0), 2024-02-13
Supplement: 12864_2024_10064_MOESM7_ESM.pdf [file 12864_2024_10064_MOESM7_ESM.pdf]

- 1 **Additional file 7: DEGs (indicated in red) in the IL17 signaling KEEG pathway between**
- 2 **unchallenged and challenged colon high (top), colon low (middle) and ileum low (lowest)**
- 3 **organoids. Permission for the use of these figures was obtained from KEGG.**

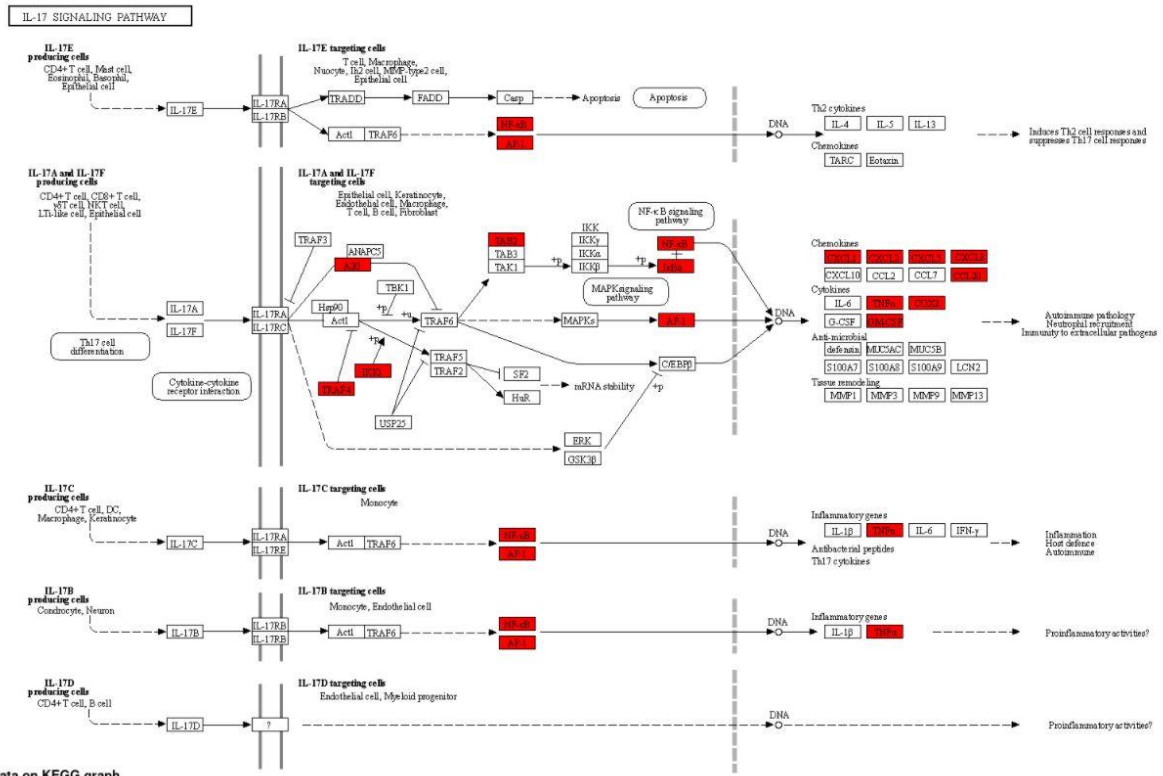

4 Data on KEGG graph  
Rendered by Pathview

IL-17 SIGNALING PATHWAY

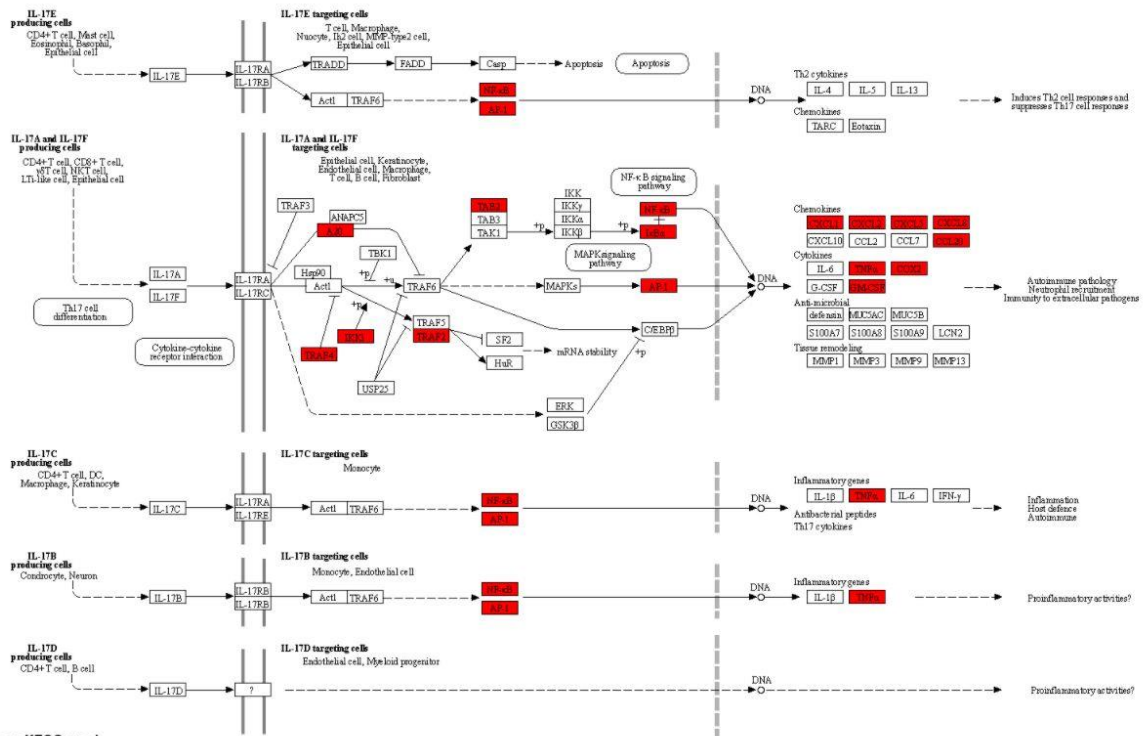

5 Data on KEGG graph  
Rendered by Pathview

6

IL-17 SIGNALING PATHWAY

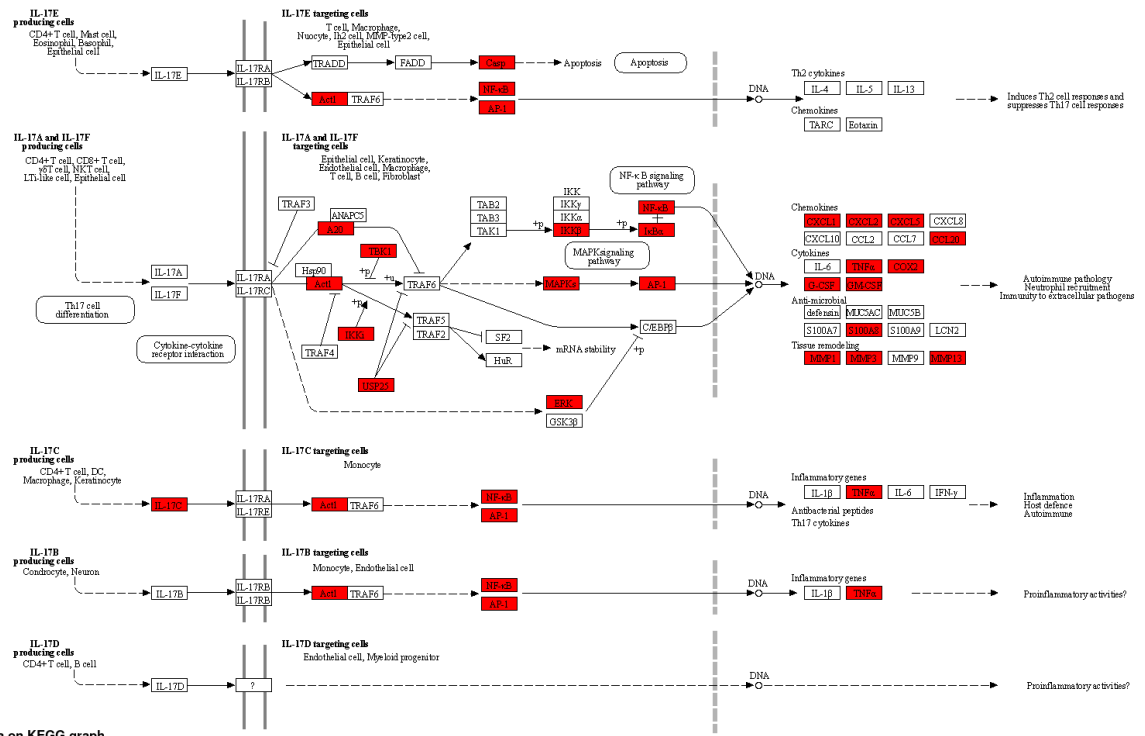

7 Data on KEGG graph  
Rendered by Pathview
