# Supplementary material for: Transcriptomic analysis of intestinal organoids, derived from pigs divergent in feed efficiency, and their response to Escherichia coli
Source: PubMed Central journal article supplement (PMC10863143; doi:10.1186/s12864-024-10064-0), 2024-02-13
Supplement: 12864_2024_10064_MOESM9_ESM.pdf [file 12864_2024_10064_MOESM9_ESM.pdf]

- 1 **Additional file 9: DEGs (indicated in red) in the NF-kappa B signaling KEGG pathway between**
- 2 **unchallenged and challenged colon high (top), colon low (middle) and ileum low (lowest)**
- 3 **organoids. Permission for the use of these figures was obtained from KEGG.**

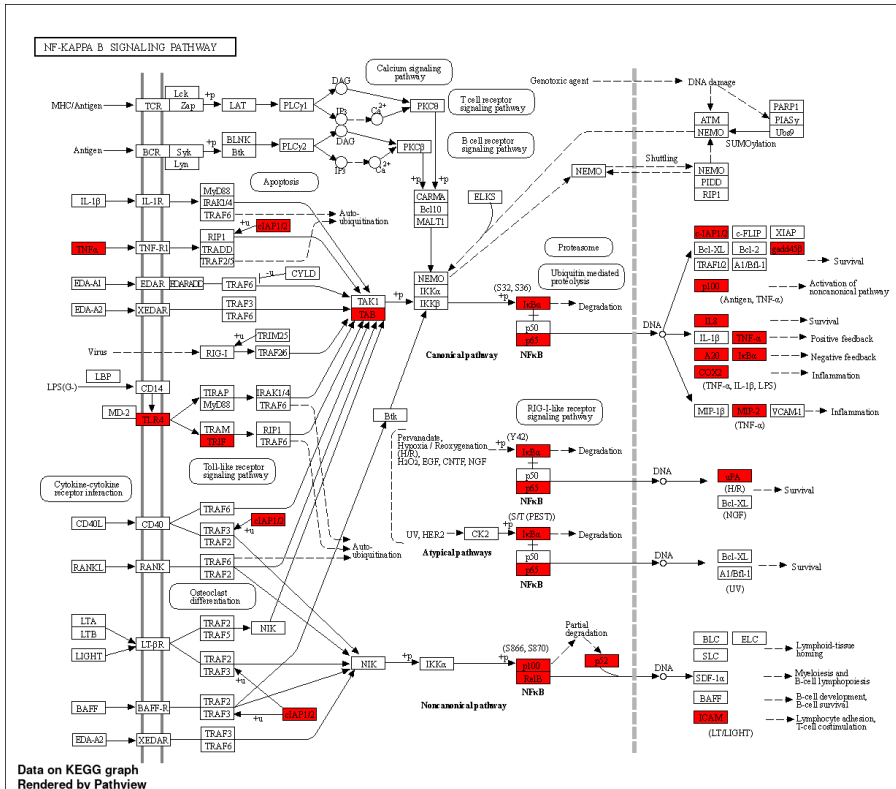

4

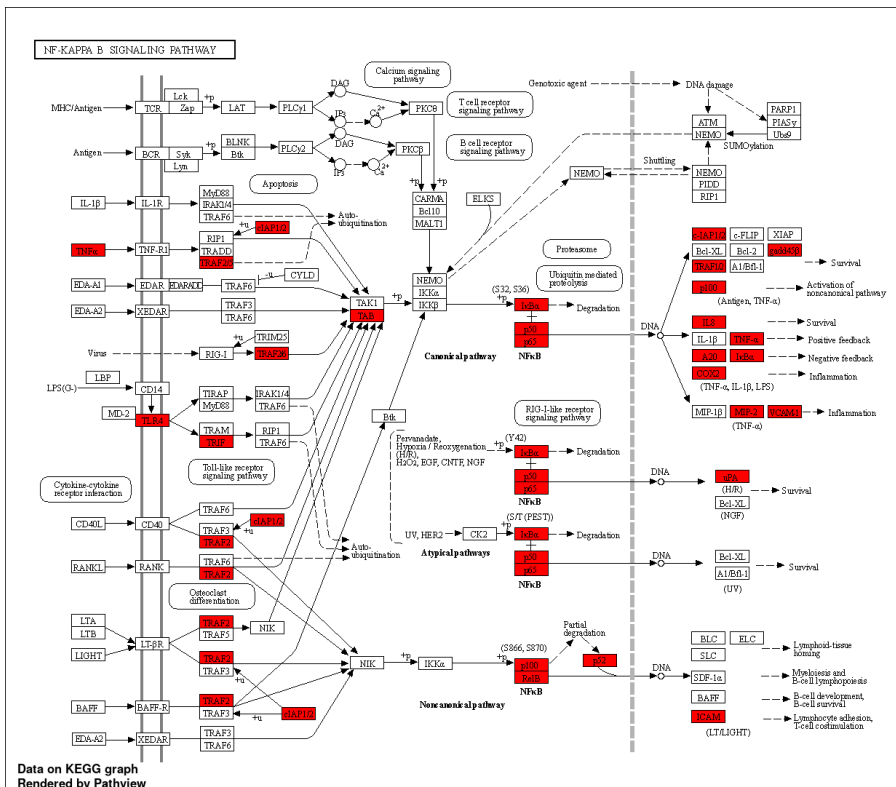

5

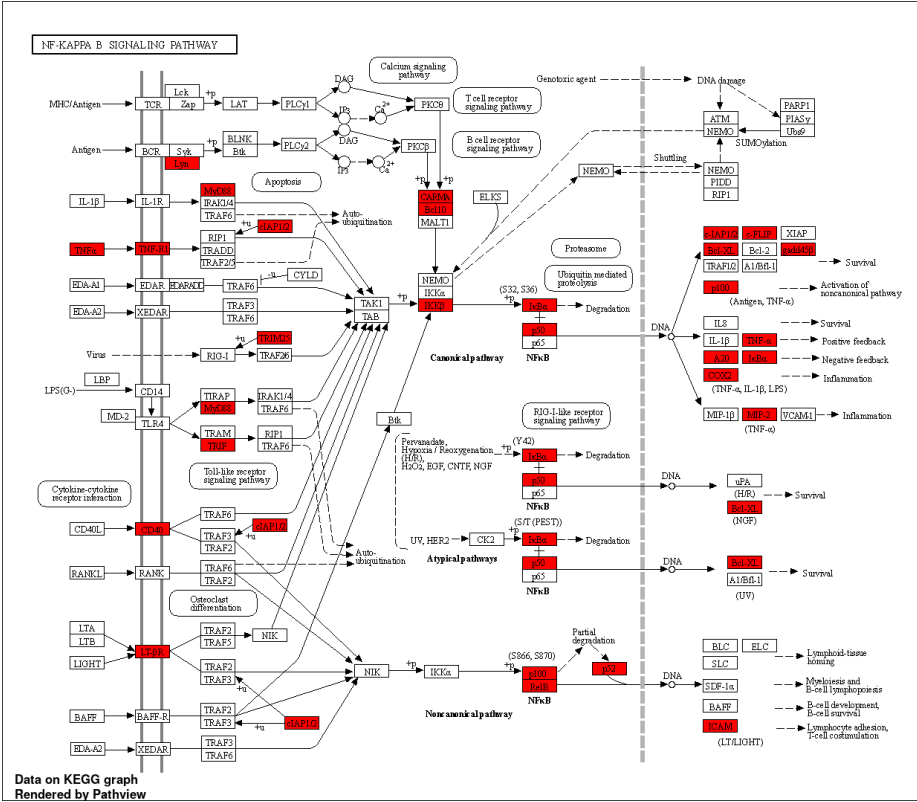

6

Data on KEGG graph  
Rendered by Pathview
