# Supplementary material for: Transcriptomic analysis of intestinal organoids, derived from pigs divergent in feed efficiency, and their response to Escherichia coli
Source: PubMed Central journal article supplement (PMC10863143; doi:10.1186/s12864-024-10064-0), 2024-02-13
Supplement: 12864_2024_10064_MOESM10_ESM.pdf [file 12864_2024_10064_MOESM10_ESM.pdf]

- 1 **Additional file 10:** DEGs (indicated in red) in the NOD signaling KEGG pathway between
- 2 unchallenged and challenged colon high (top), colon low (middle) and ileum low (lowest)
- 3 organoids. Permission for the use of these figures was obtained from KEGG.

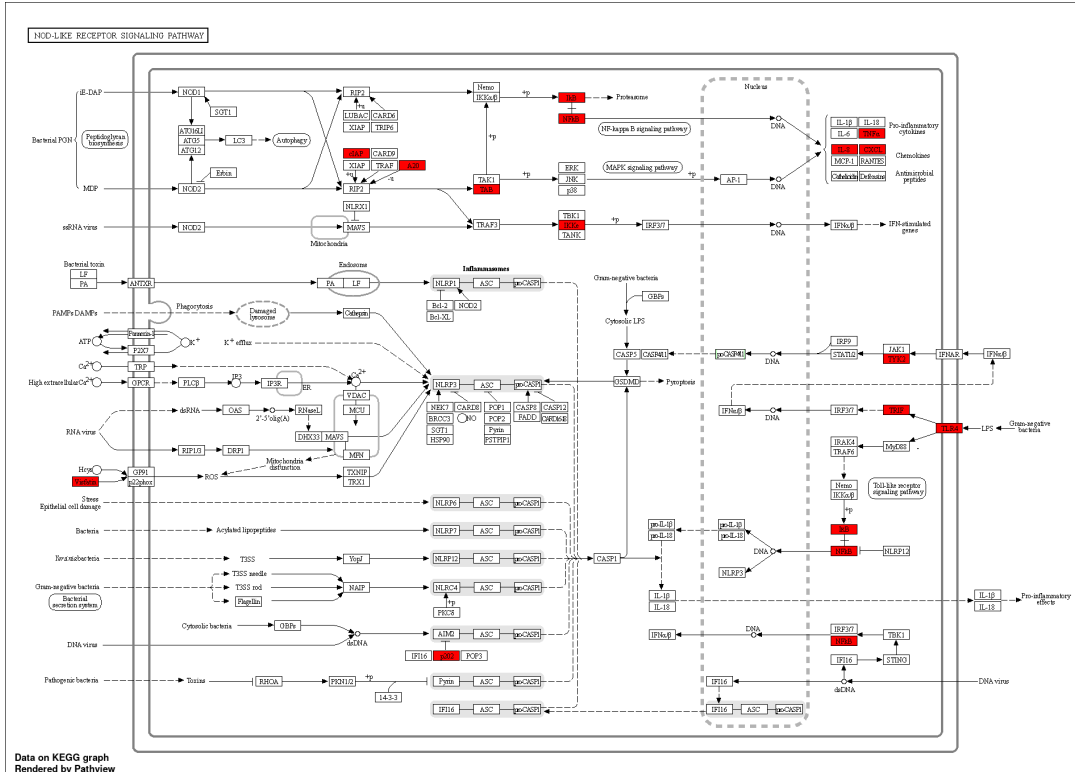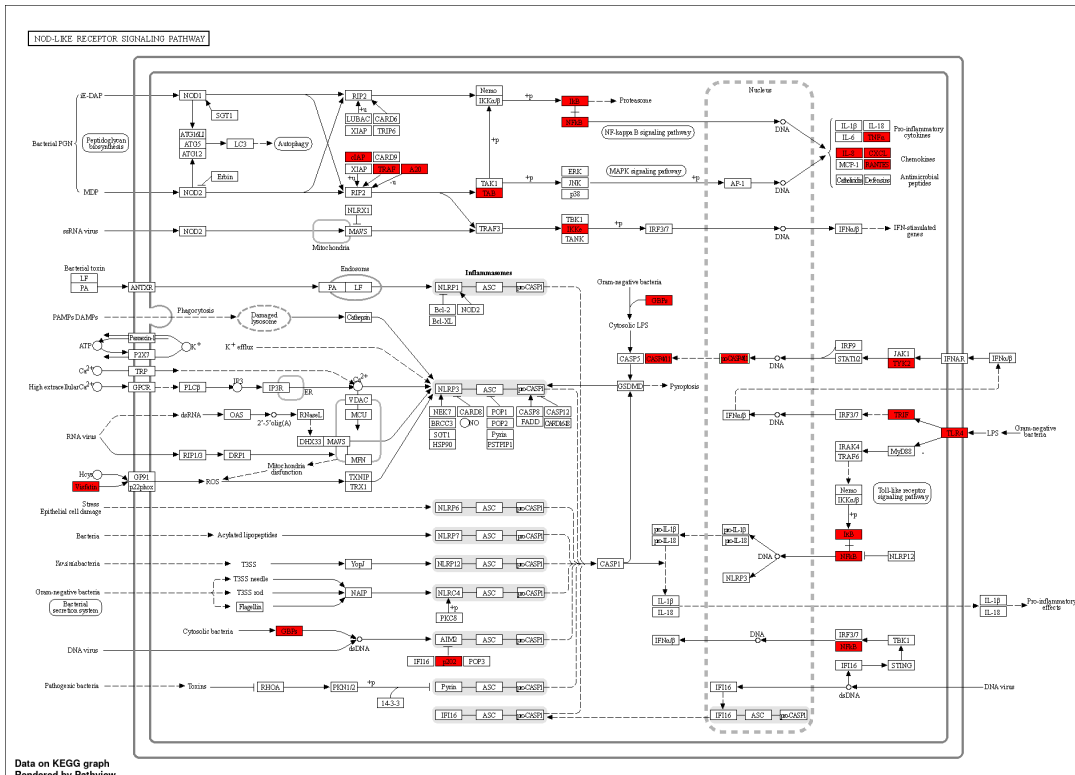

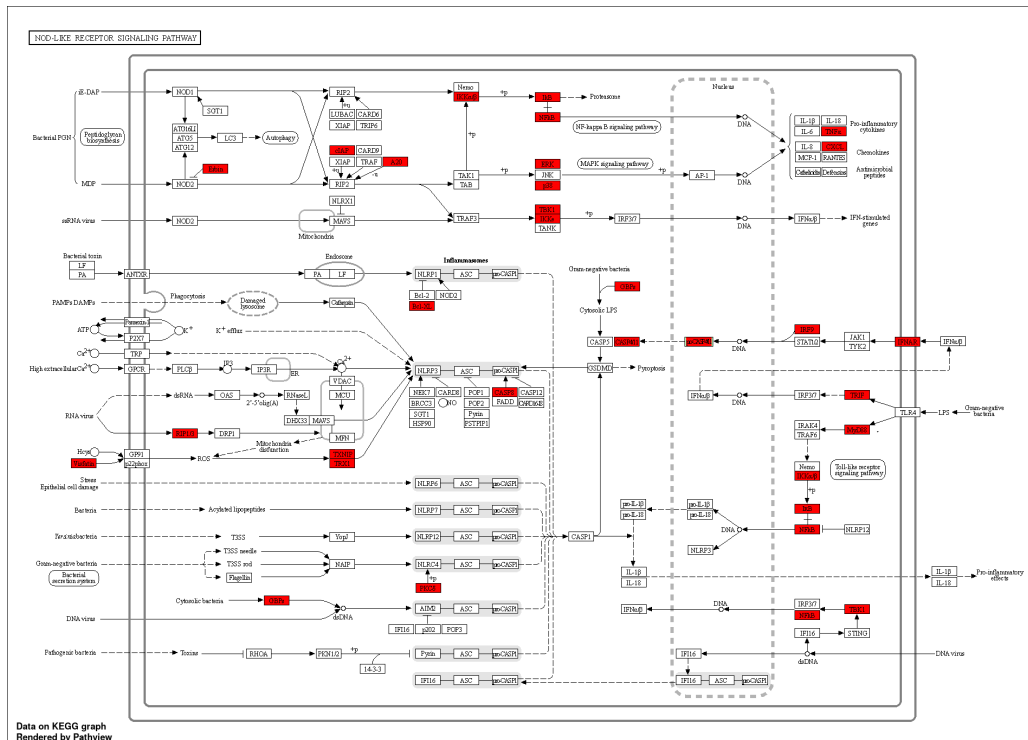

6

7
